# Supplementary material for: Apocarotenoids in the sexual interaction of Phycomyces blakesleeanus
Source: Royal Society of Chemistry journal article supplement (doi:10.1039/c2ob07147a), 2012-01-01
Supplement: c2ob07147a.pdf [file c2ob07147a.pdf]

## Supporting Information

### Apocarotenoids in the sexual interaction of *Phycomyces*

Silvia Polaino,<sup>a</sup> Jose A. Gonzalez-Delgado,<sup>b</sup> Pilar Arteaga,<sup>b</sup> M. Mar Herrador,<sup>b</sup> Alejandro F. Barrero\*<sup>b</sup> and Enrique Cerdá-Olmedo\*<sup>c</sup>

<sup>a</sup>*Division of Cell Biology and Biophysics, School of Biological Sciences, University of Missouri-Kansas City, MO 64110, USA,* <sup>b</sup>*Department of Organic Chemistry, Institute of Biotechnology, University of Granada, Avda. Fuente Nueva, s/n, 18071 Granada, Spain,* and <sup>c</sup>*Department of Genetics, Faculty of Biology, University of Sevilla, Reina Mercedes, s/n, 41071 Sevilla, Spain,*  
afbarre@ugr.es; [eco@us.es](mailto:eco@us.es).

#### List of Contents for Experimental Section

|                                                |    |
|------------------------------------------------|----|
| A simple estimate of the apocarotenoid content | 1S |
| Figure S1                                      | 2S |
| Figure S2                                      | 3S |
| Figure S3                                      | 4S |
| Figure S4                                      | 5S |
| <sup>1</sup> H and <sup>13</sup> C NMR Spectra | 6S |

#### A simple estimate of the apocarotenoid content

A simple estimate,  $C$ , of the increased apocarotenoid content was calculated as  $C = B - kA$ , where  $B$  is the absorbance at 328 nm in mated cultures,  $A$  is their maximum absorption near 260 nm, and  $k$  is the quotient between the respective values,  $B'$  and  $A'$ , in single cultures (Figure S1). The  $k$  values were  $0.048 \pm 0.005$  for cultures on minimal agar and  $0.071 \pm 0.007$  for cultures on enriched agar (mean and

standard deviation of the distribution in 8 independent experiments with the wild-type cultures in each case). This difference reflected the differences in the composition of agar media.

The C value was  $0.37 \pm 0.03$  in 12 mated cultures of the wild types and  $0.011 \pm 0.003$  in 19 mated cultures of the *carB* mutant strains (means and standard error). These values were independent of the media (minimal or enriched agar) and the strains (NRRL1555, NRRL1554, and A56).

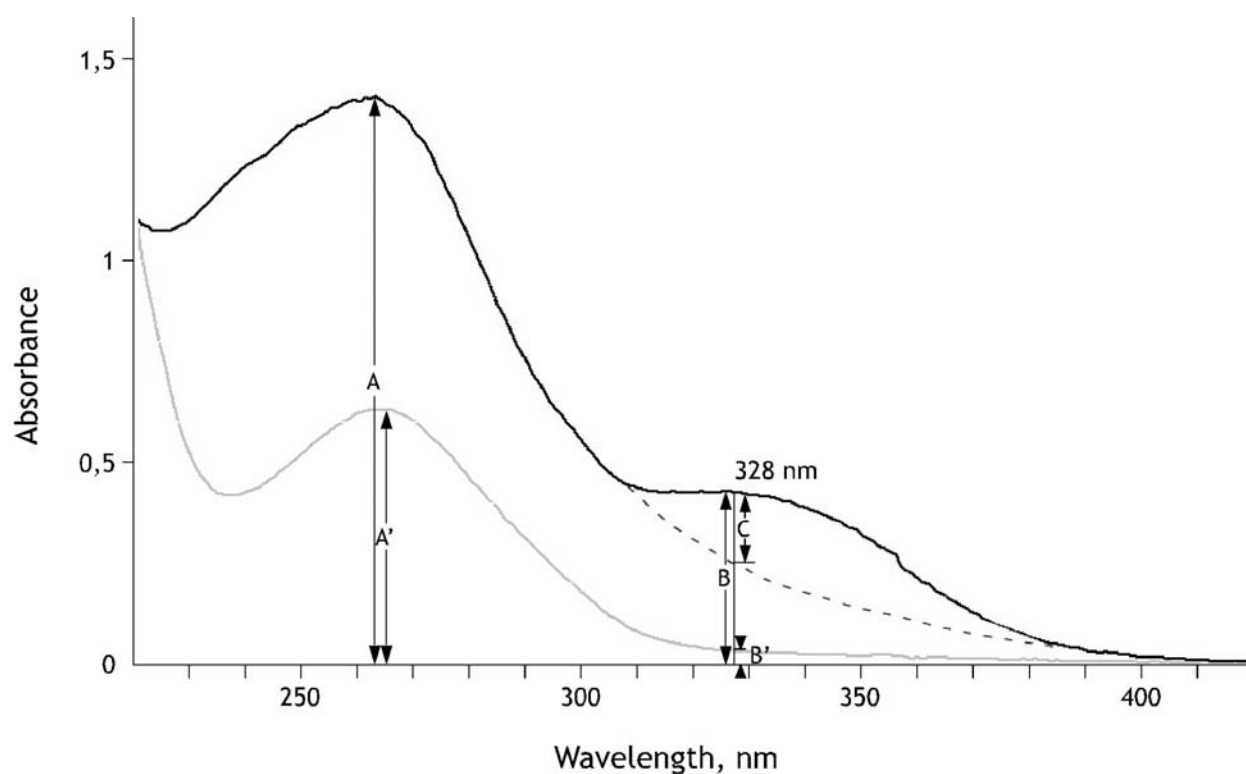

**Figure S1.** Absorption spectra of culture media of wild-type strains A56 and NRRL1555 grown together for five days on minimal agar (mated culture, thick line), and NRRL1555 was grown alone in the same way (single culture, thin line). A and A' are the maximum absorbances (at about 260 nm); B and B' are the absorbances at 328 nm.

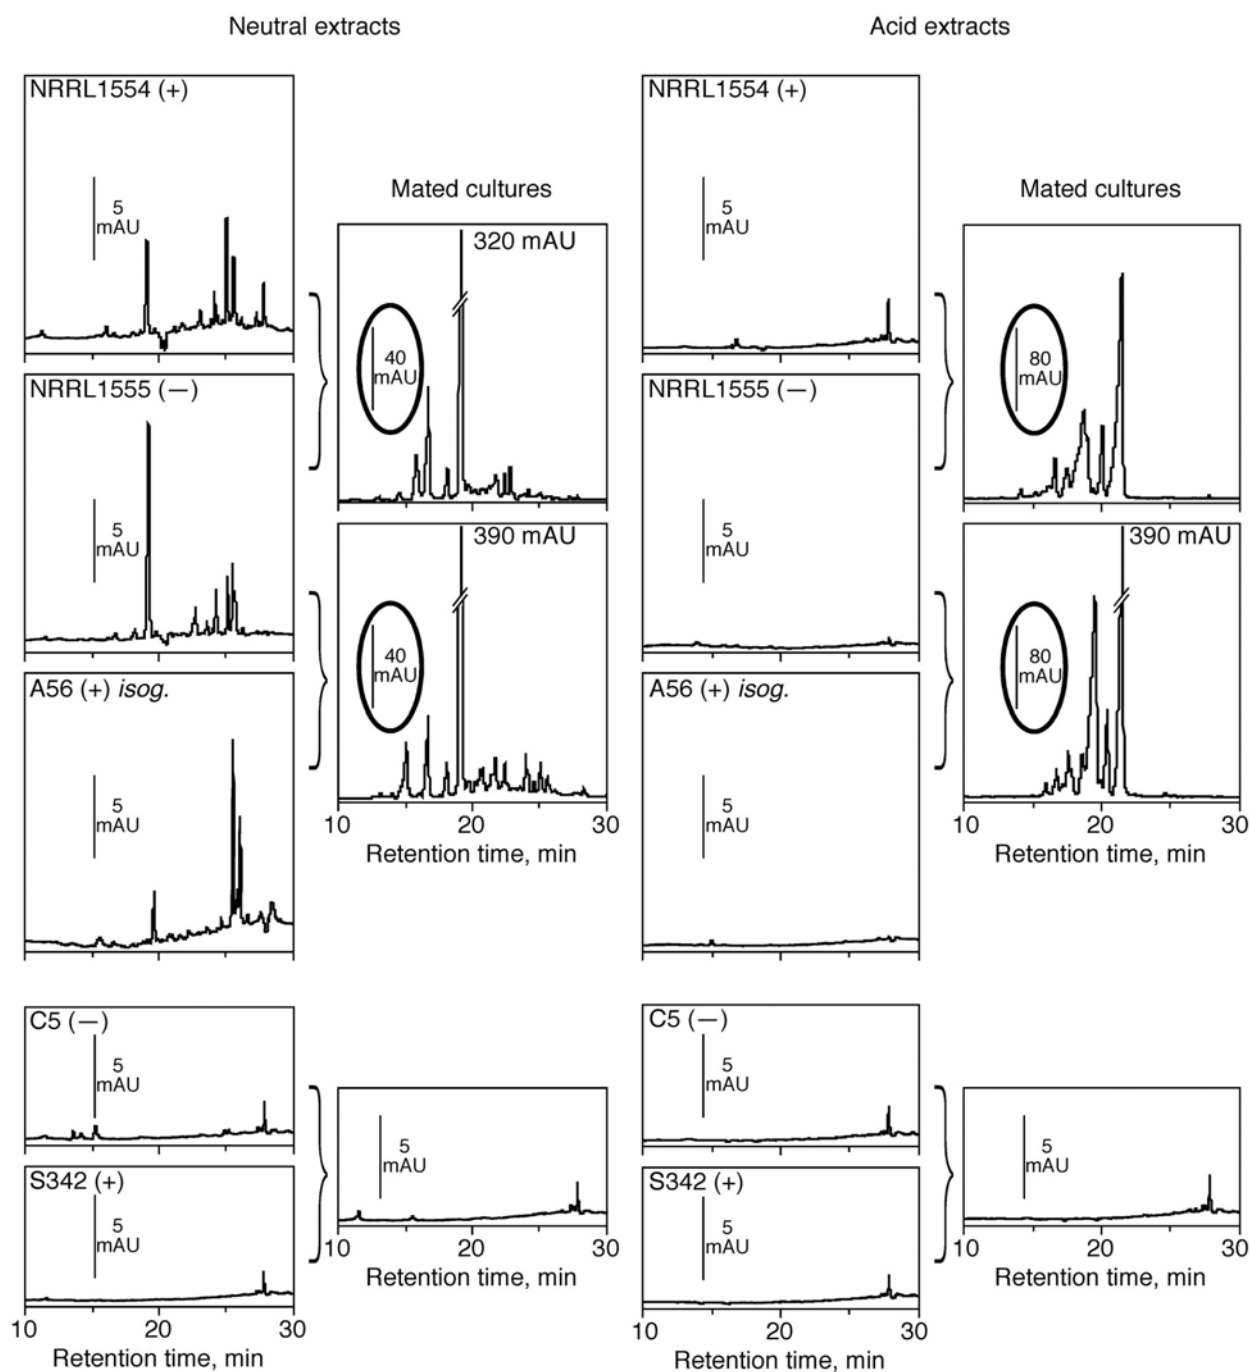

**Figure S2.** Chromatograms of neutral and acid extracts of single and mated cultures of the wild types NRRL1554, NRRL1555 and A56 and the *carB* mutants C5 and S342, unable to produce  $\beta$ -carotene. The ordinates represent the absorbance at 328 nm in milliunits. Note the changes of scale. The sex, (+) or (-), is indicated for each strain.

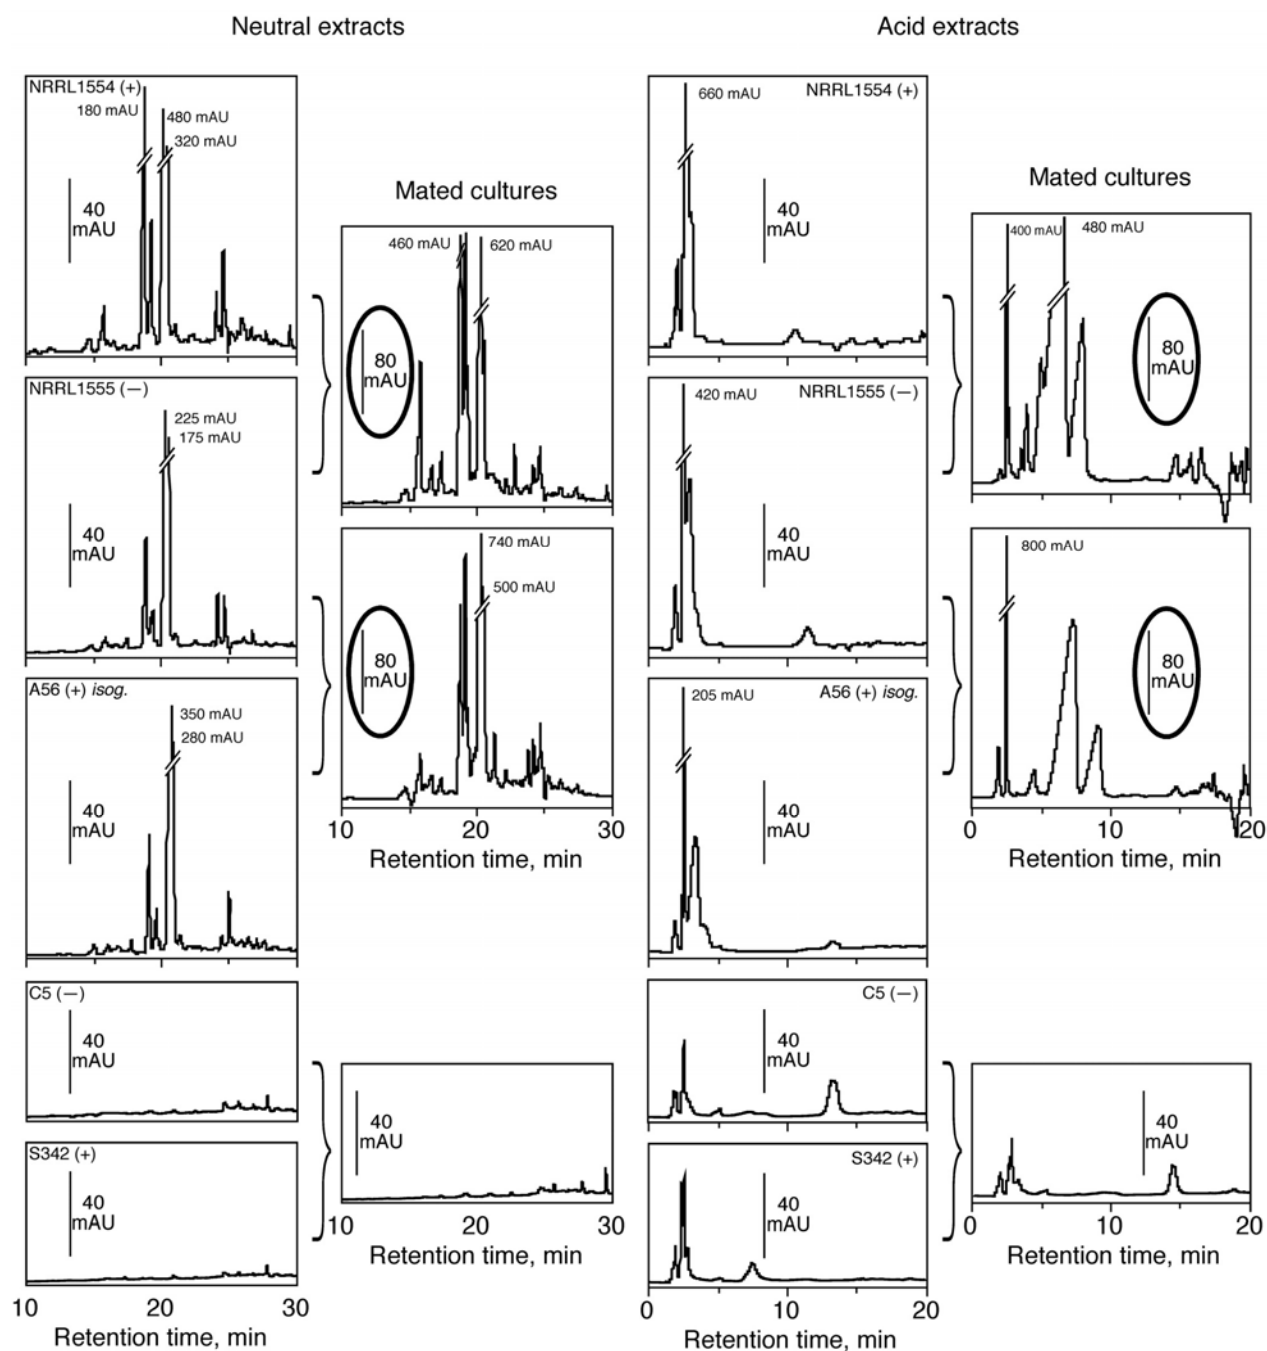

**Figure S3.** Chromatograms of neutral and acid extracts of single and mated cultures of the wild-types NRRL1554, NRRL1555 and A56 and the *carB* mutants C5 and S342, unable to produce  $\beta$ -carotene. The ordinates represent the absorbance at 280 nm in milliunits. Note the changes of scale. The sex, (+) or (-), is indicated for each strain.

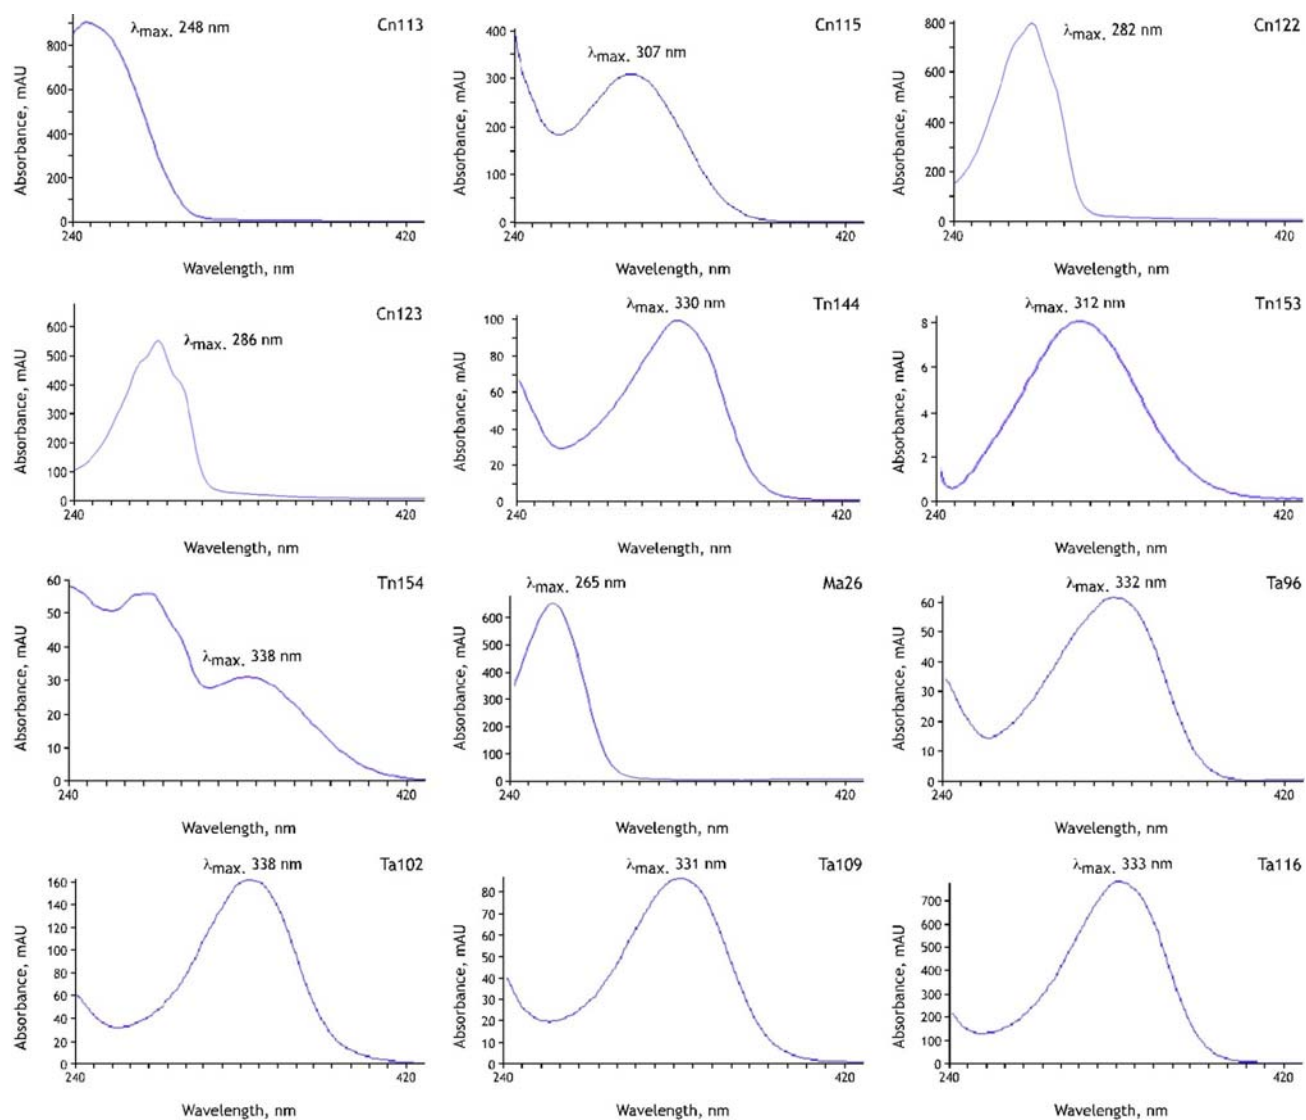

**Figure S4.** Absorption spectra of the apocarotenoids as eluted from the HPLC column.

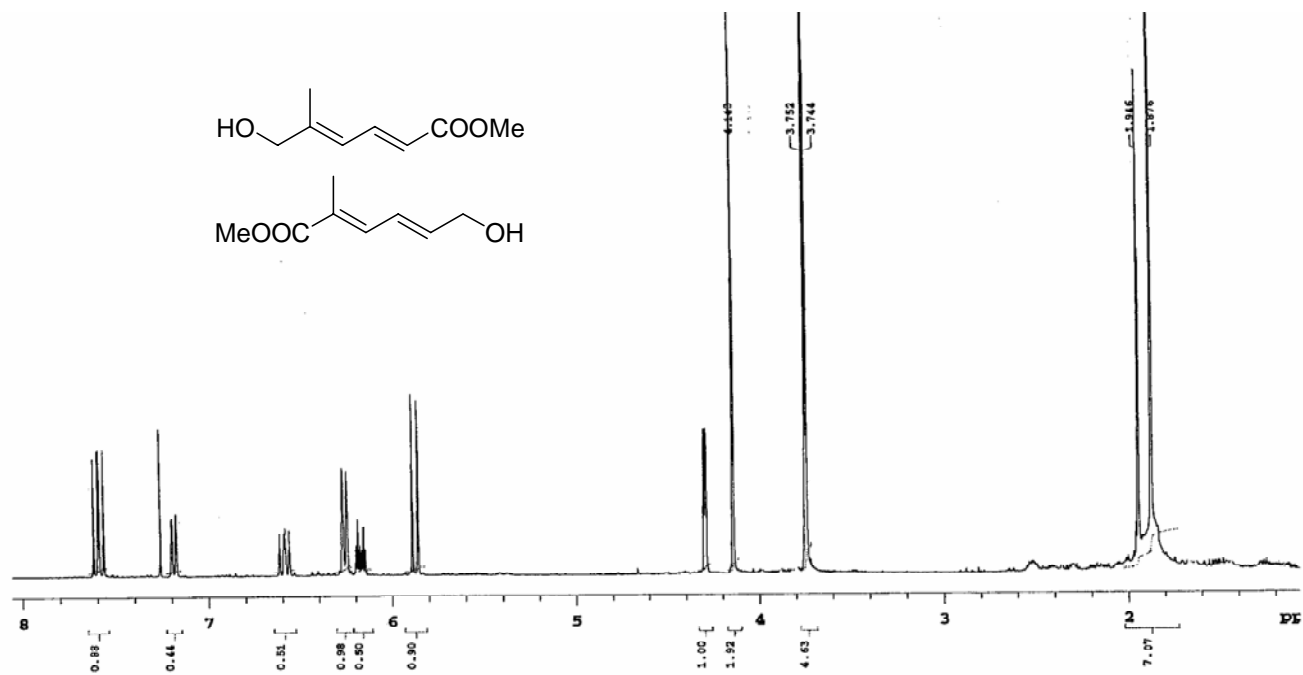

Spectrum <sup>1</sup>H NMR of **4a** + **5a**

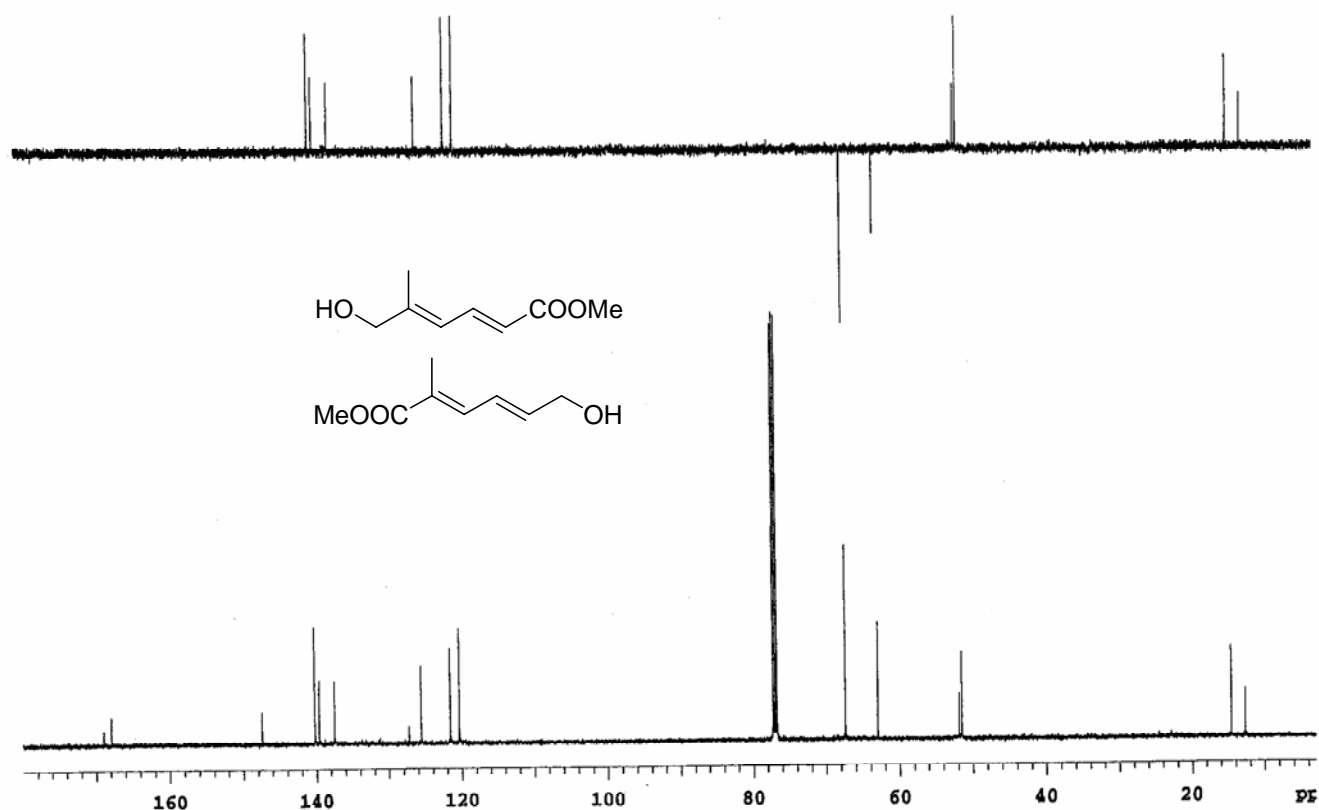

Spectrum <sup>13</sup>C NMR of **4a** + **5a**

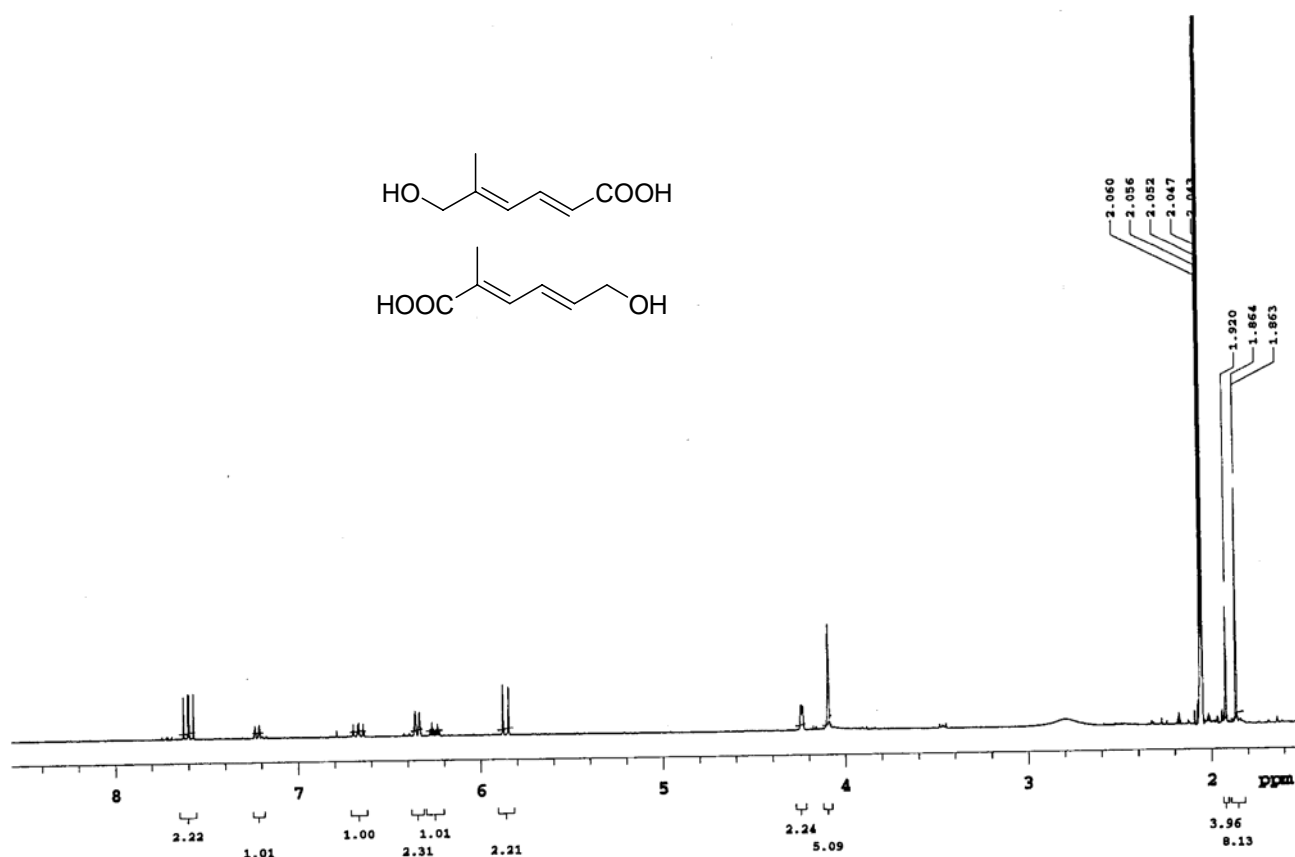

Spectrum <sup>1</sup>H NMR of 4 + 5

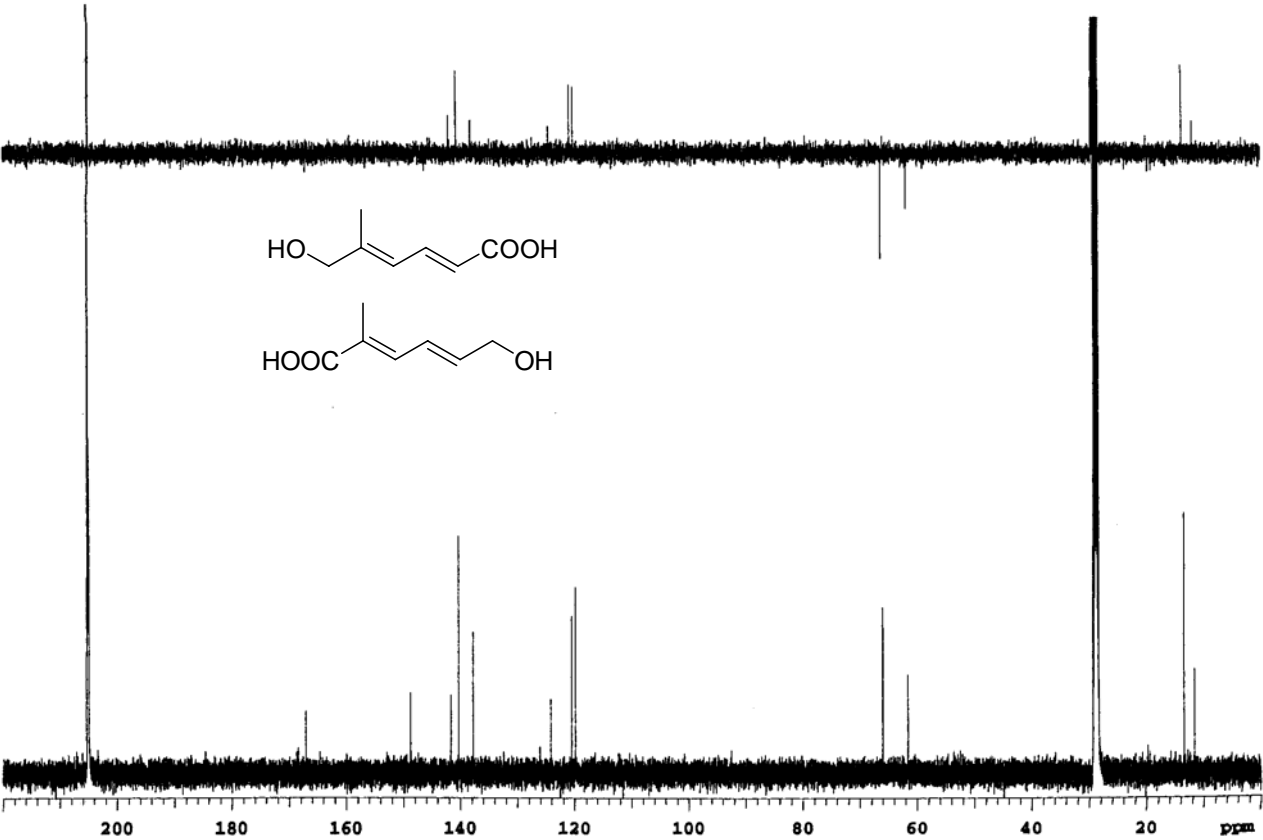

Spectrum  $^{13}\text{C}$  NMR of **4** + **5**

11A\_23-9-08  
File: datos/Barrero/11A\_23-9-08/proton.fid  
Sample id: tmpstudy  
Pulse Sequence: s2pul

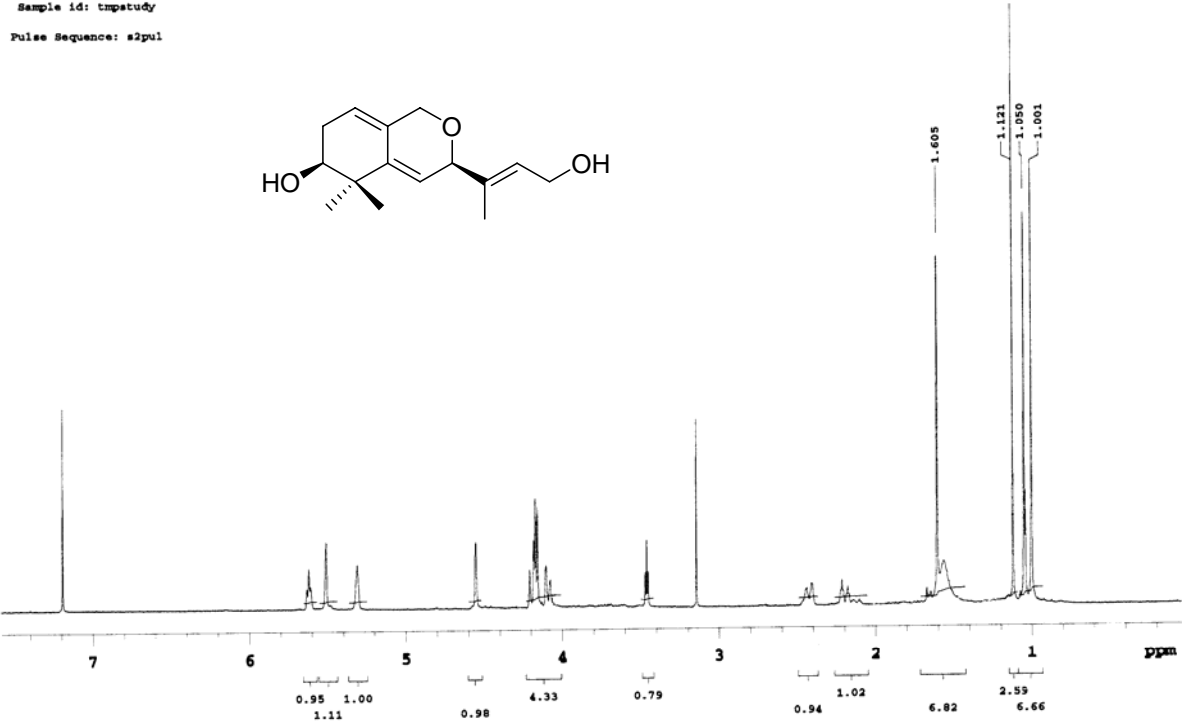

Spectrum <sup>1</sup>H NMR of 6

11A\_23-9-08  
File: xp  
Sample id: tmpstudy  
Pulse Sequence: s2pul

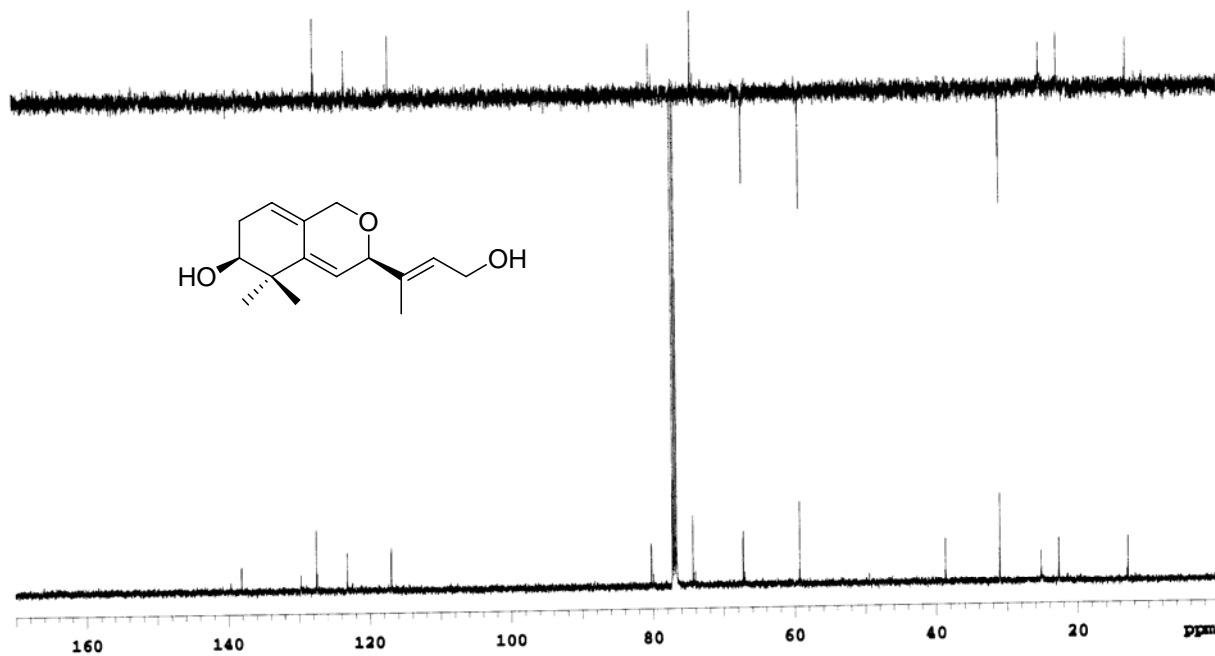

Spectrum <sup>13</sup>C NMR of 6

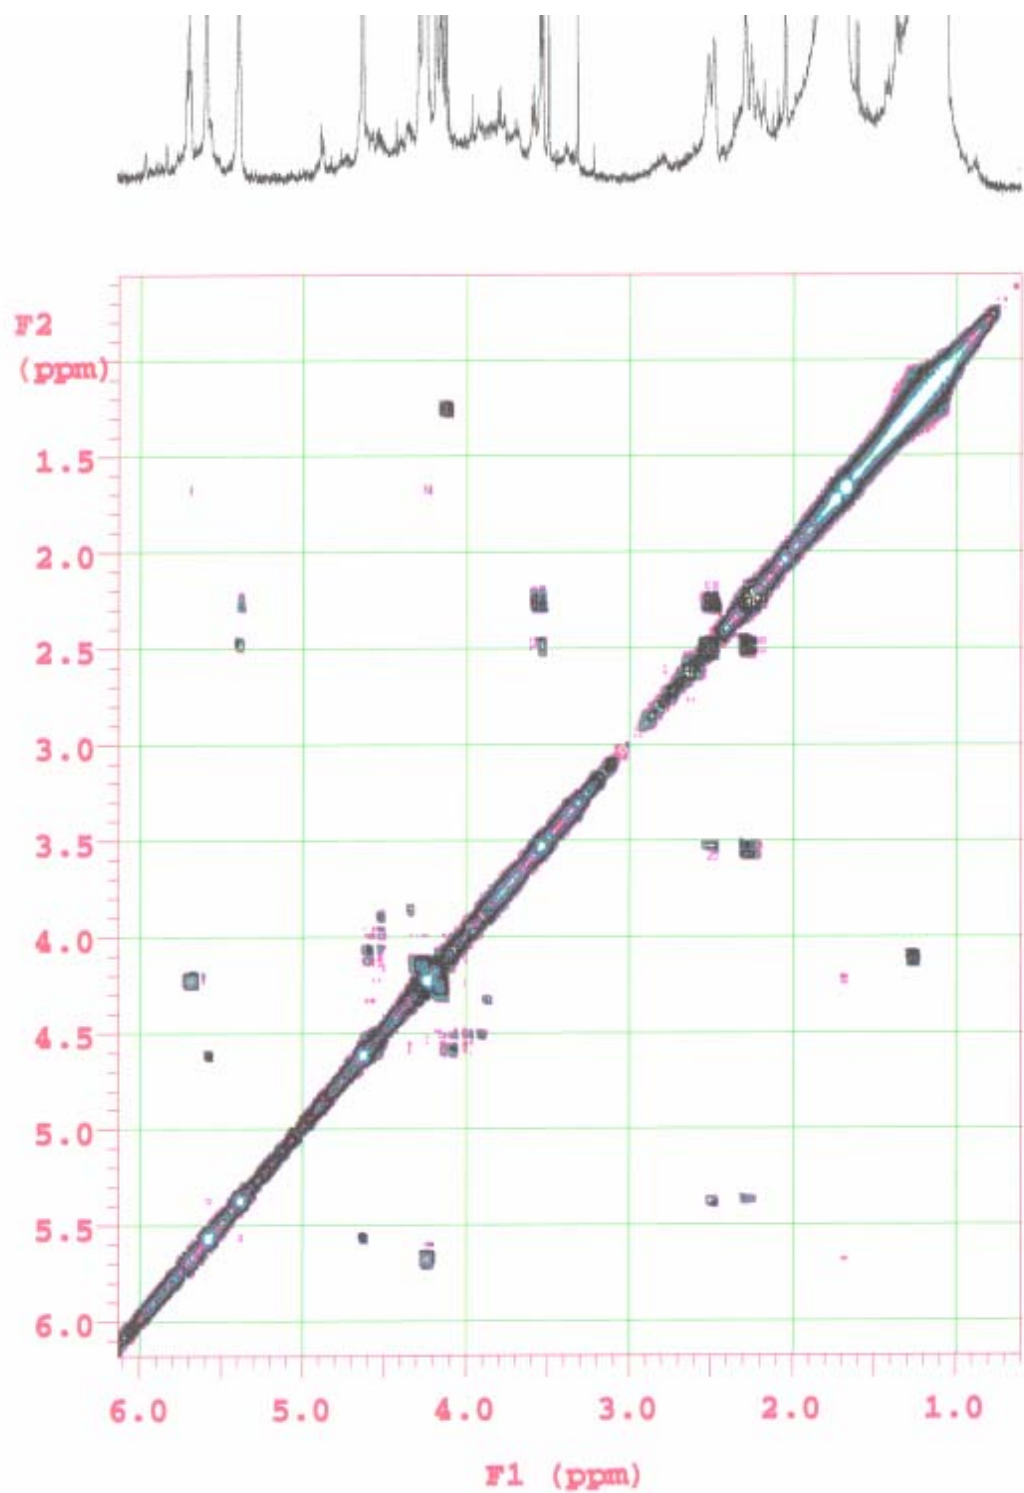

Spectrum COSY of **6**

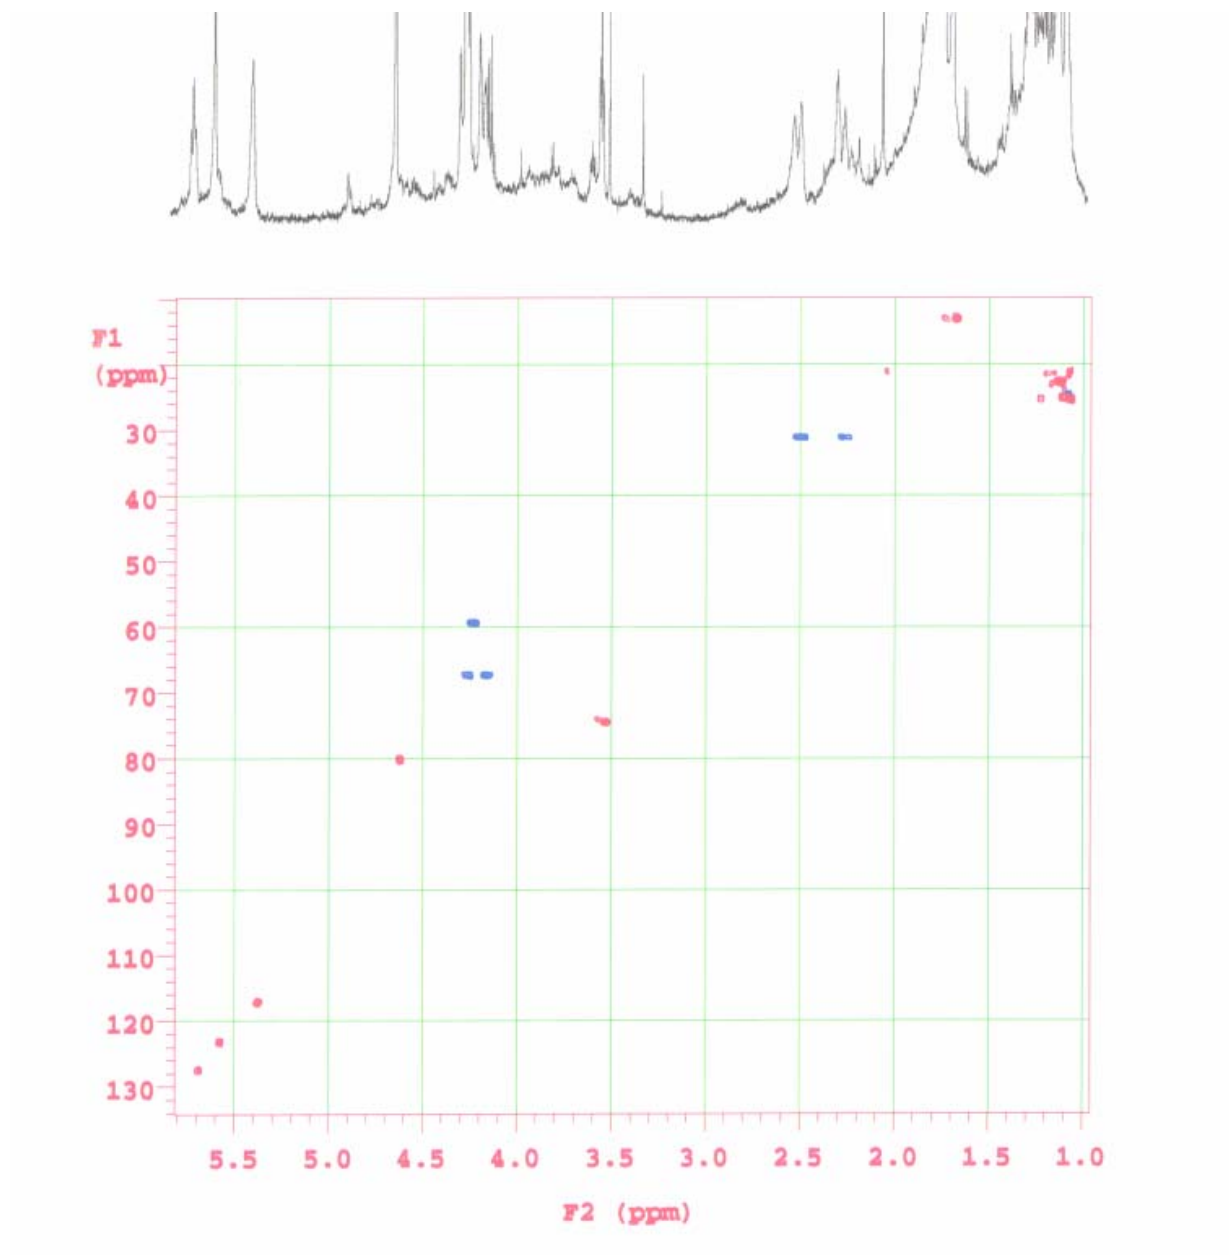

Spectrum HSQC of **6**

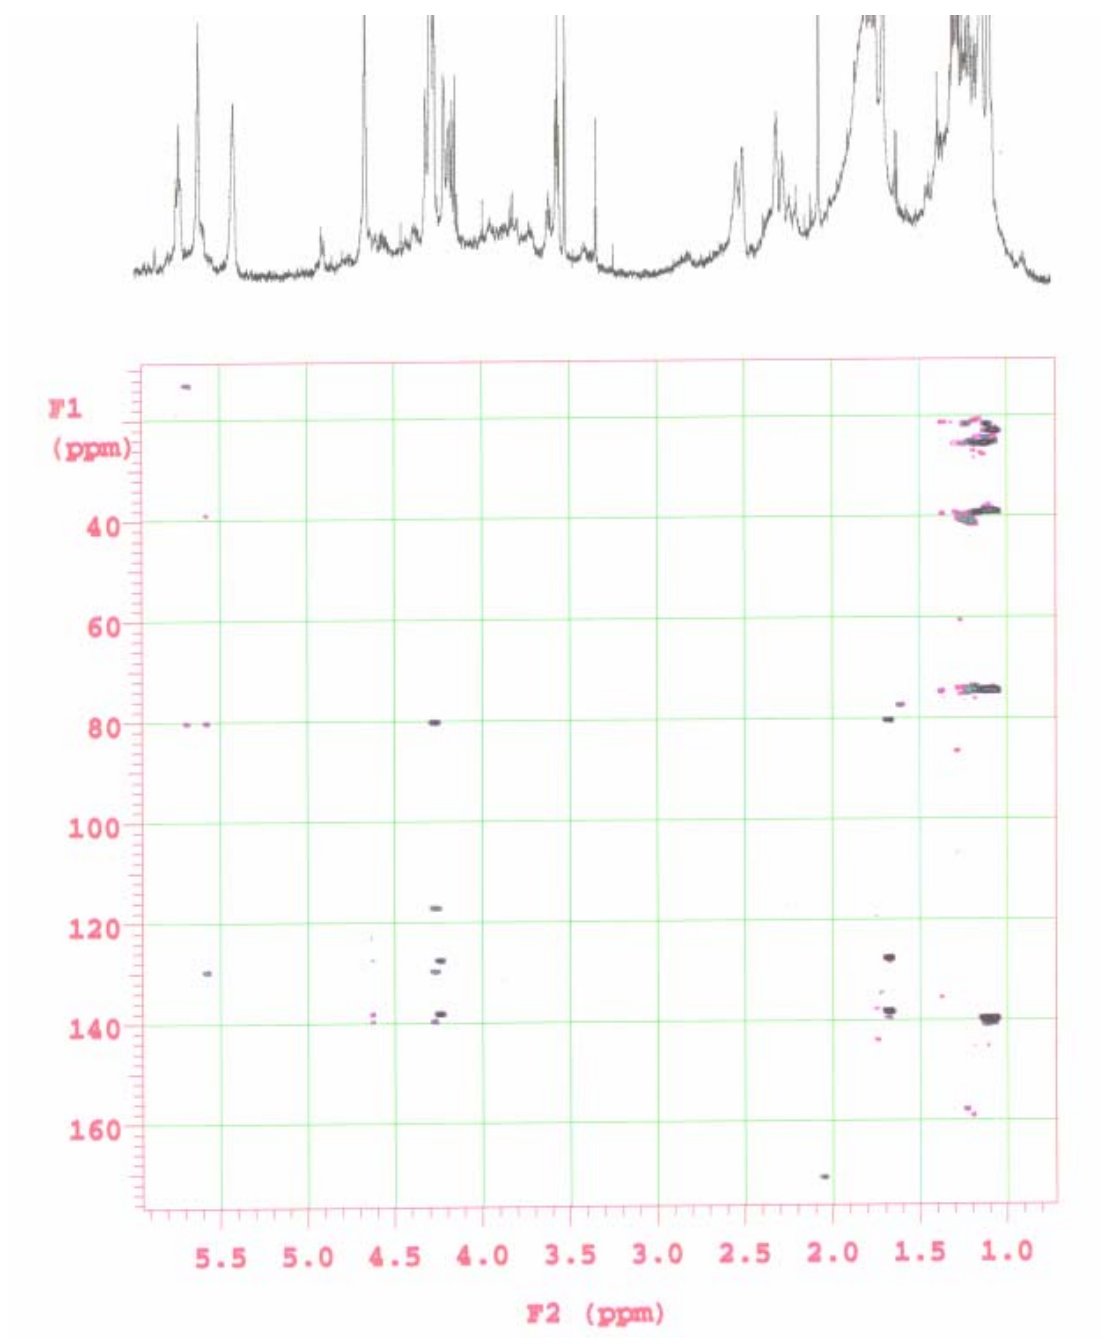

Spectrum HMBC of **6**

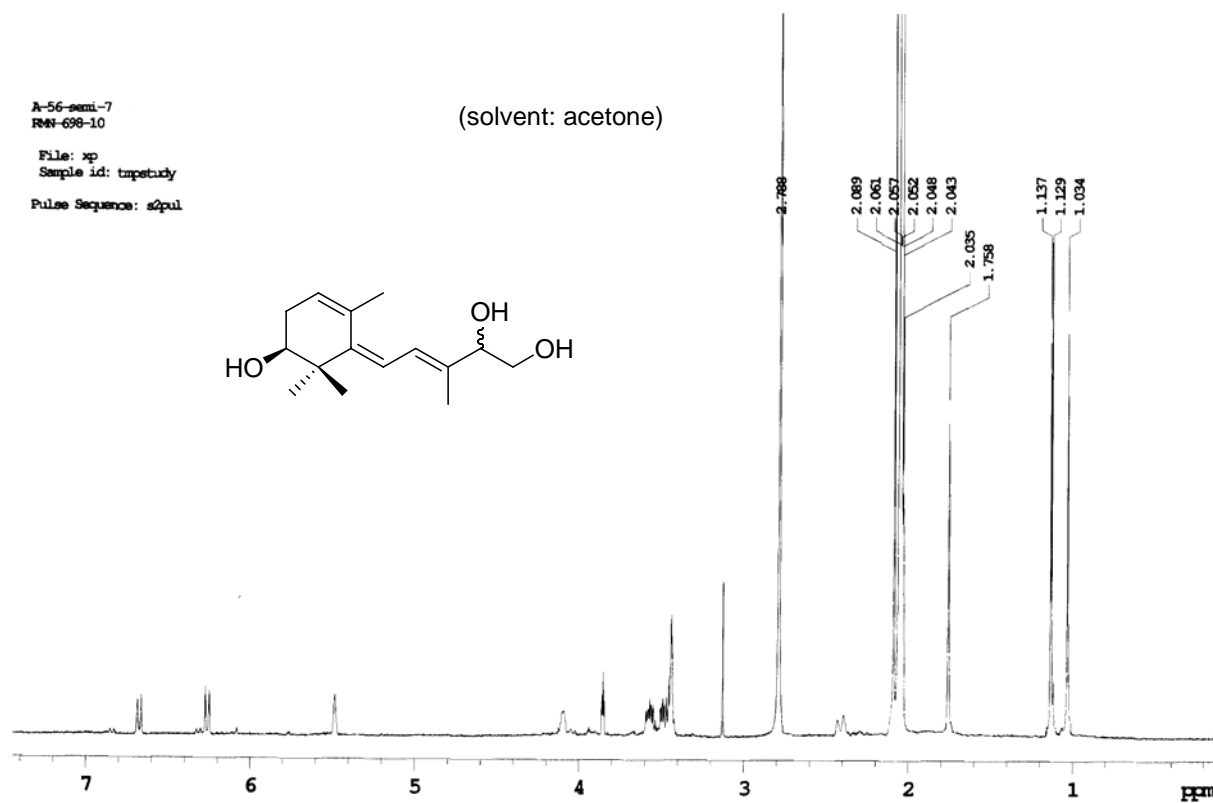

Spectrum  $^1\text{H}$  NMR of 7

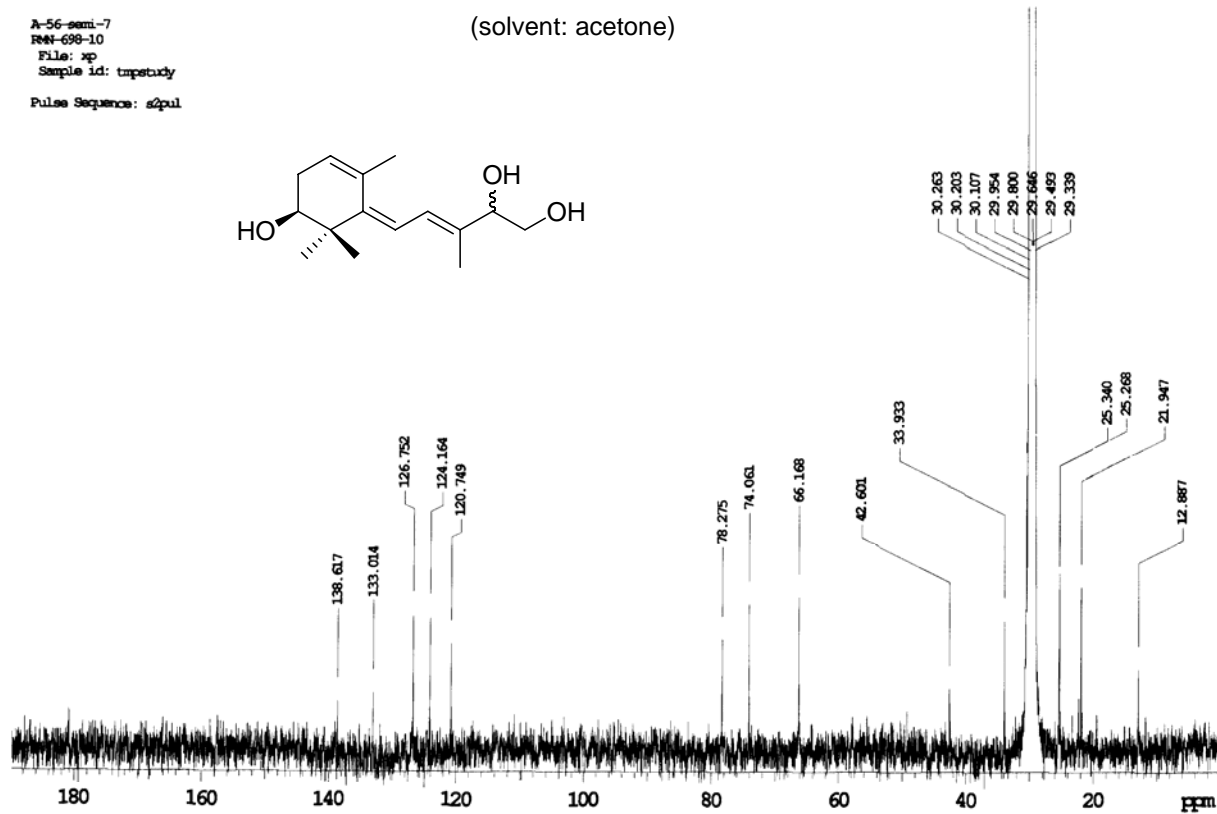

Spectrum  $^{13}\text{C}$  NMR of 7

Del - 8F  
Automation directory: /home/usuario/vnmrsys/Automation/auto\_22Jan2009\_01  
File: exp  
Sample id: tmpstudy  
Pulse Sequence: s2pul

(solvent: chloroform)

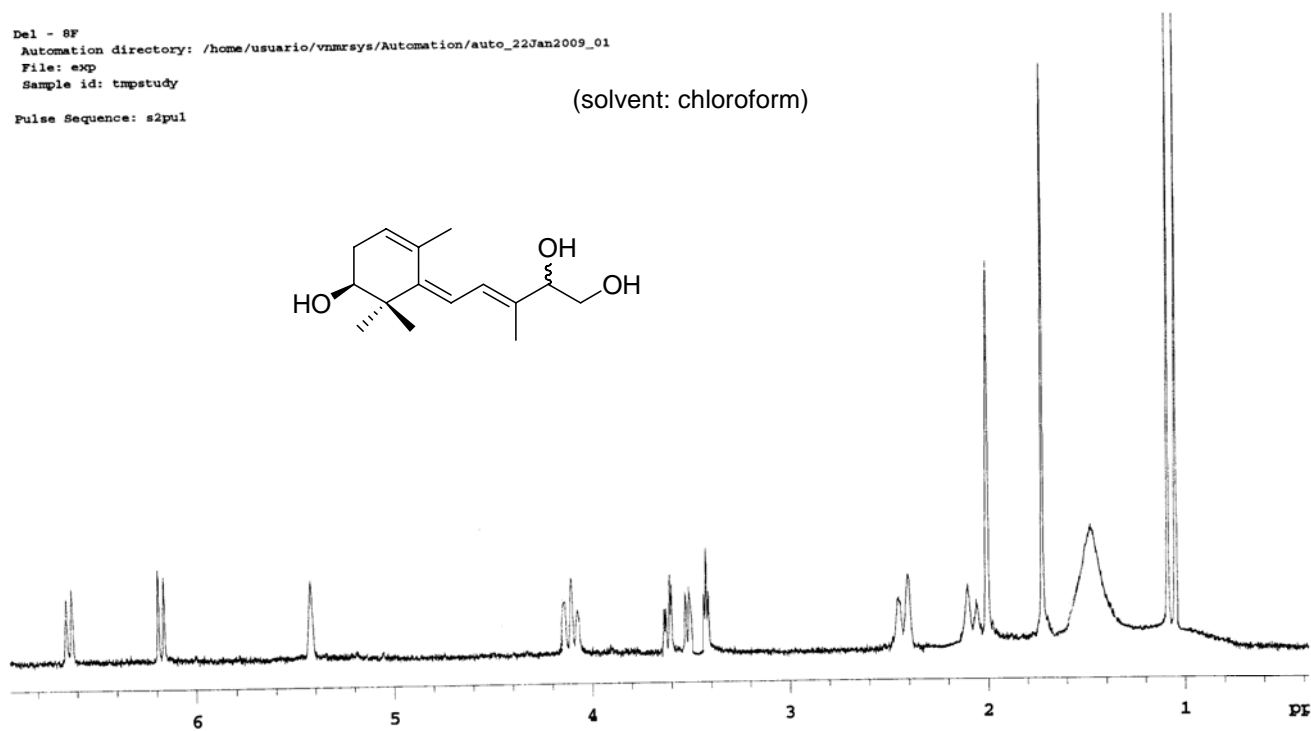

Spectrum <sup>1</sup>H NMR of 7

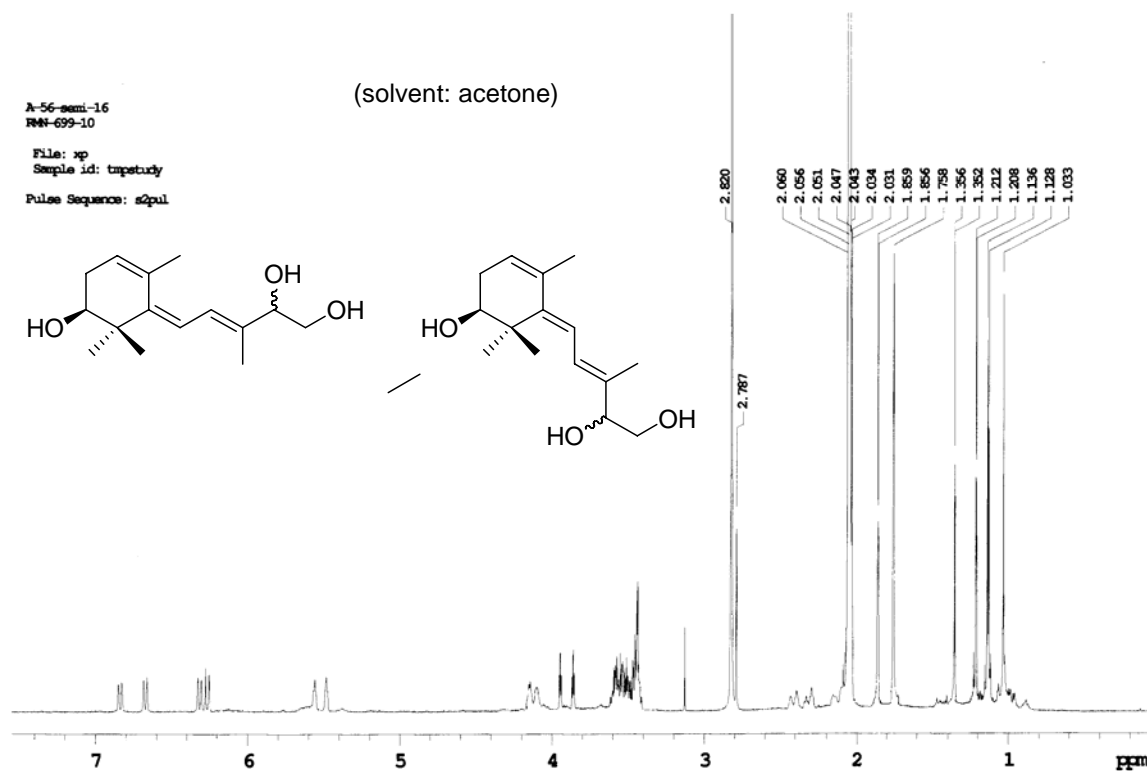

Spectrum  $^1\text{H}$  NMR of **7** + **8**

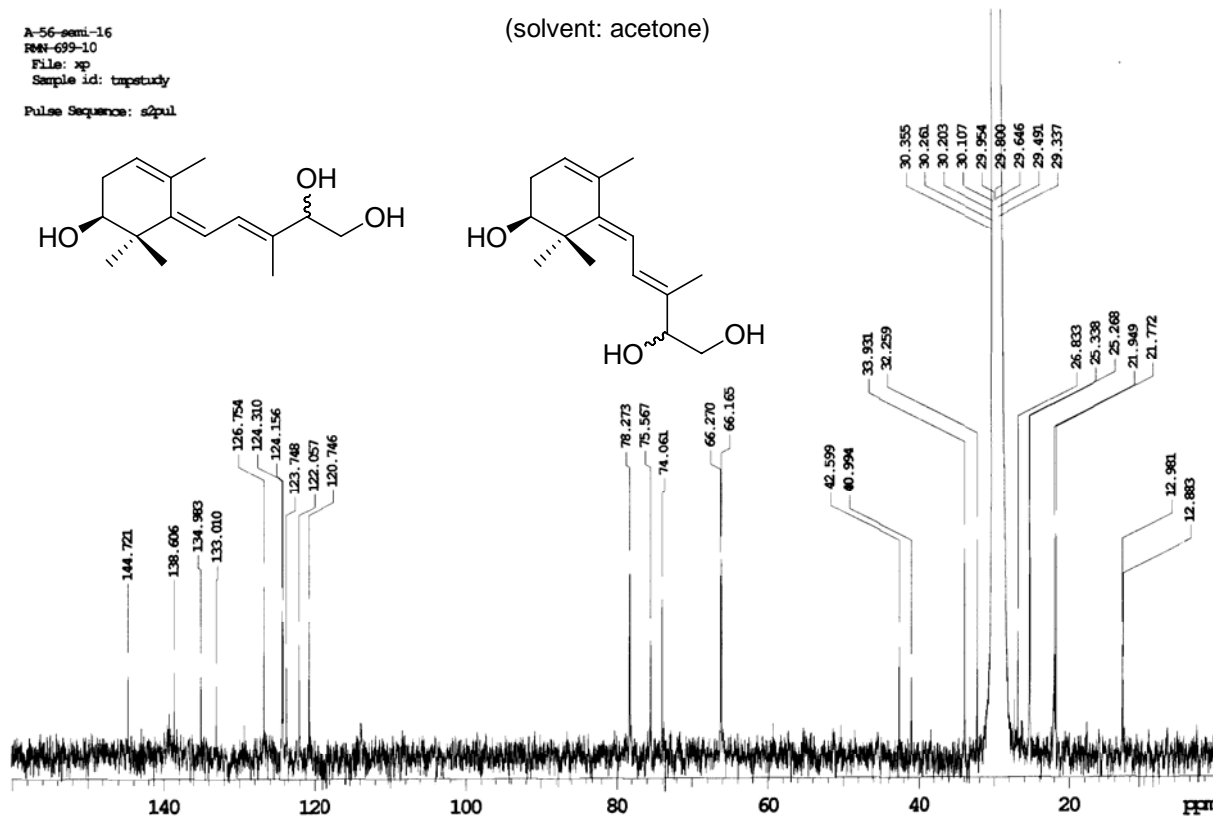

Spectrum  $^{13}\text{C}$  NMR of **7** + **8**

Del (-) Fraction 9  
 Automation directory: /home/usuario/vnmrsys/Automation/auto\_22Jan2009\_01  
 File: exp  
 Sample id: tmpstudy  
 Pulse Sequence: s2pul

(solvent: chloroform)

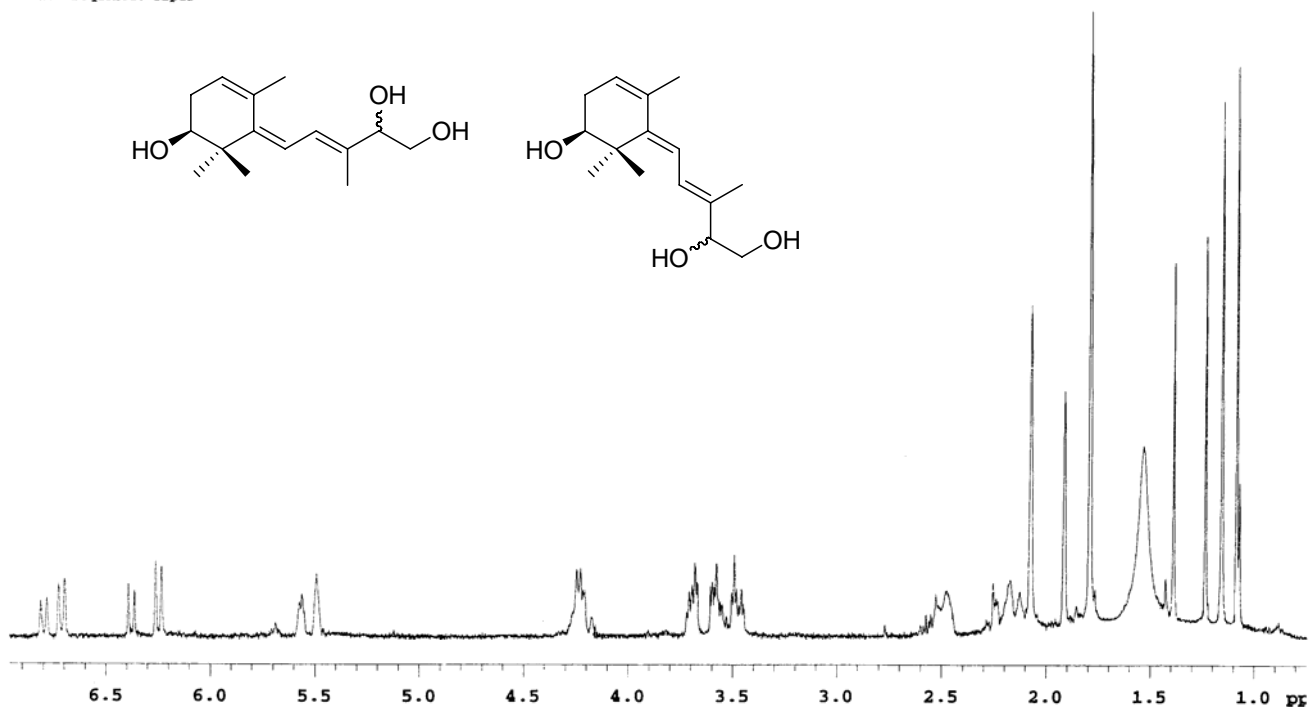

Spectrum  $^1\text{H}$  NMR of **7** + **8**

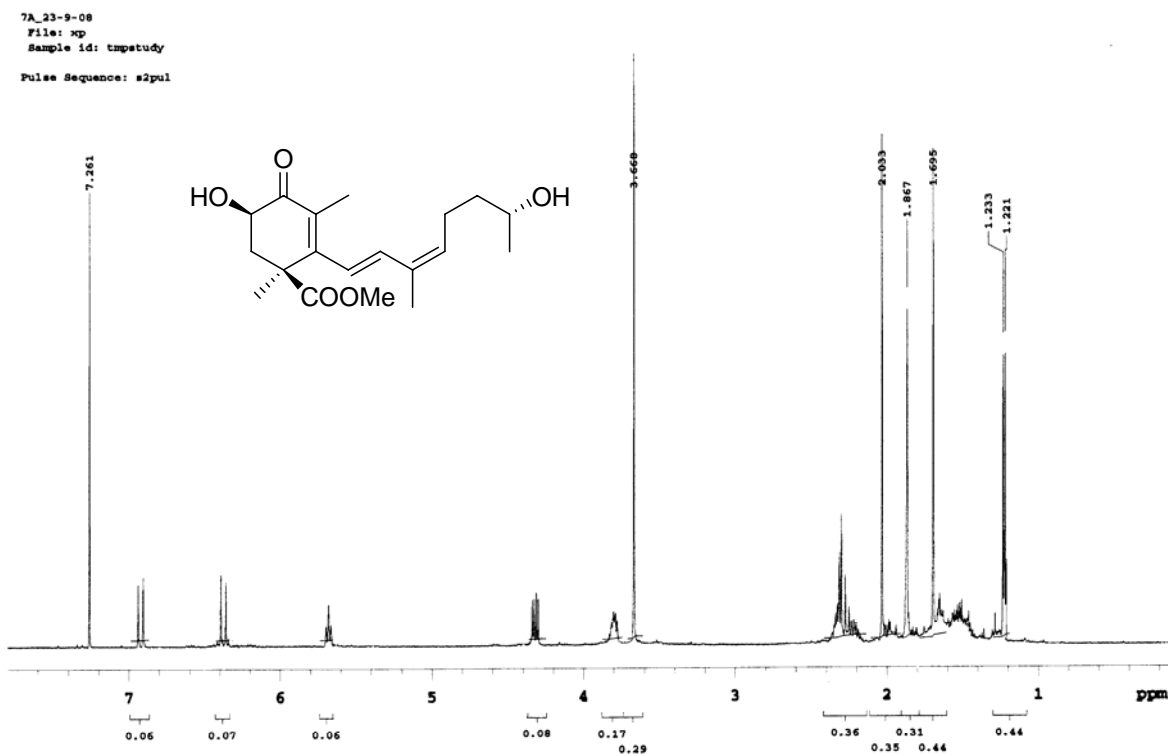

Spectrum  $^1\text{H}$  NMR of 2

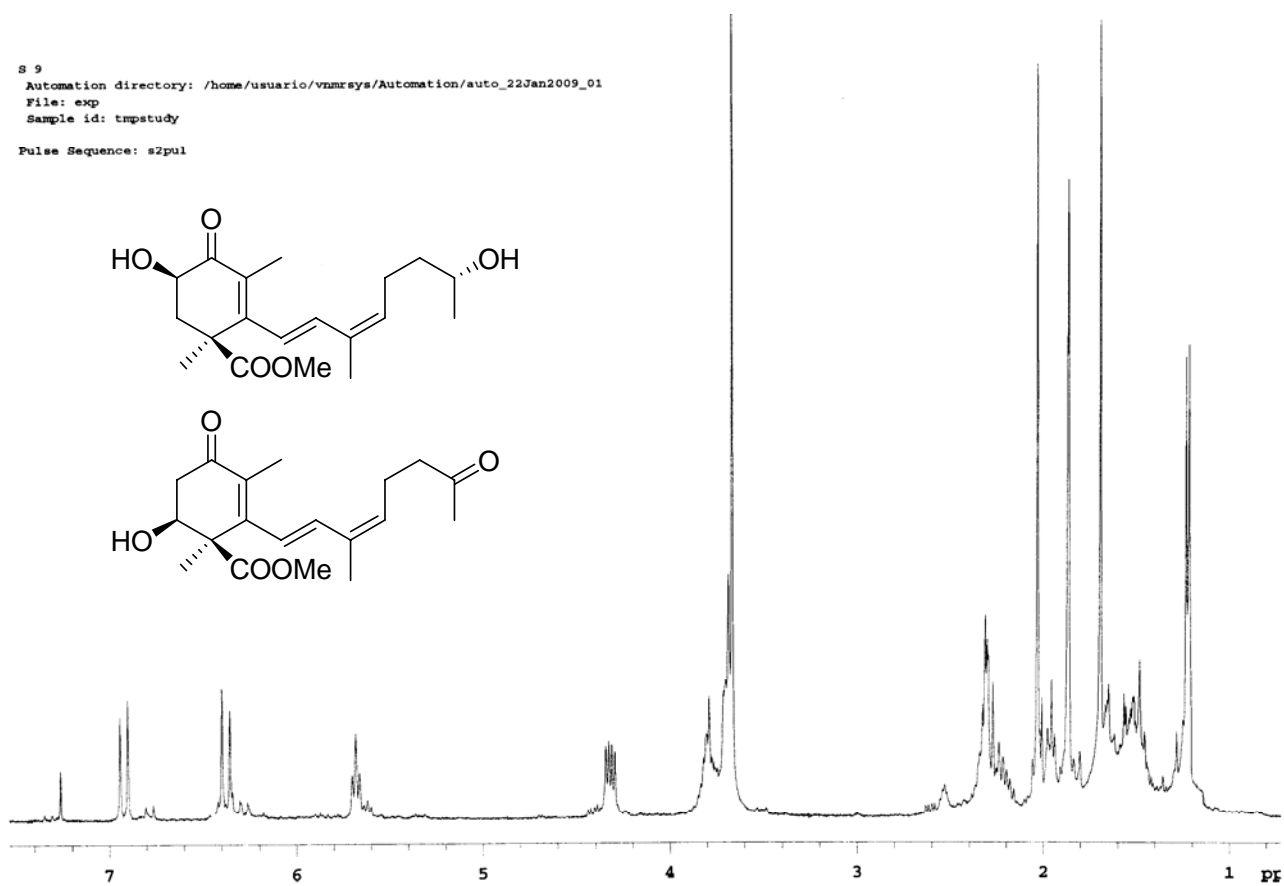

Spectrum  $^1\text{H}$  NMR of **2** + **12**

N 5 7+8  
Automation directory: /home/usuario/vnmr/sys/Automation/auto\_22Jan2009\_01  
File: exp  
Sample id: tmpstudy  
Pulse Sequence: s2pul

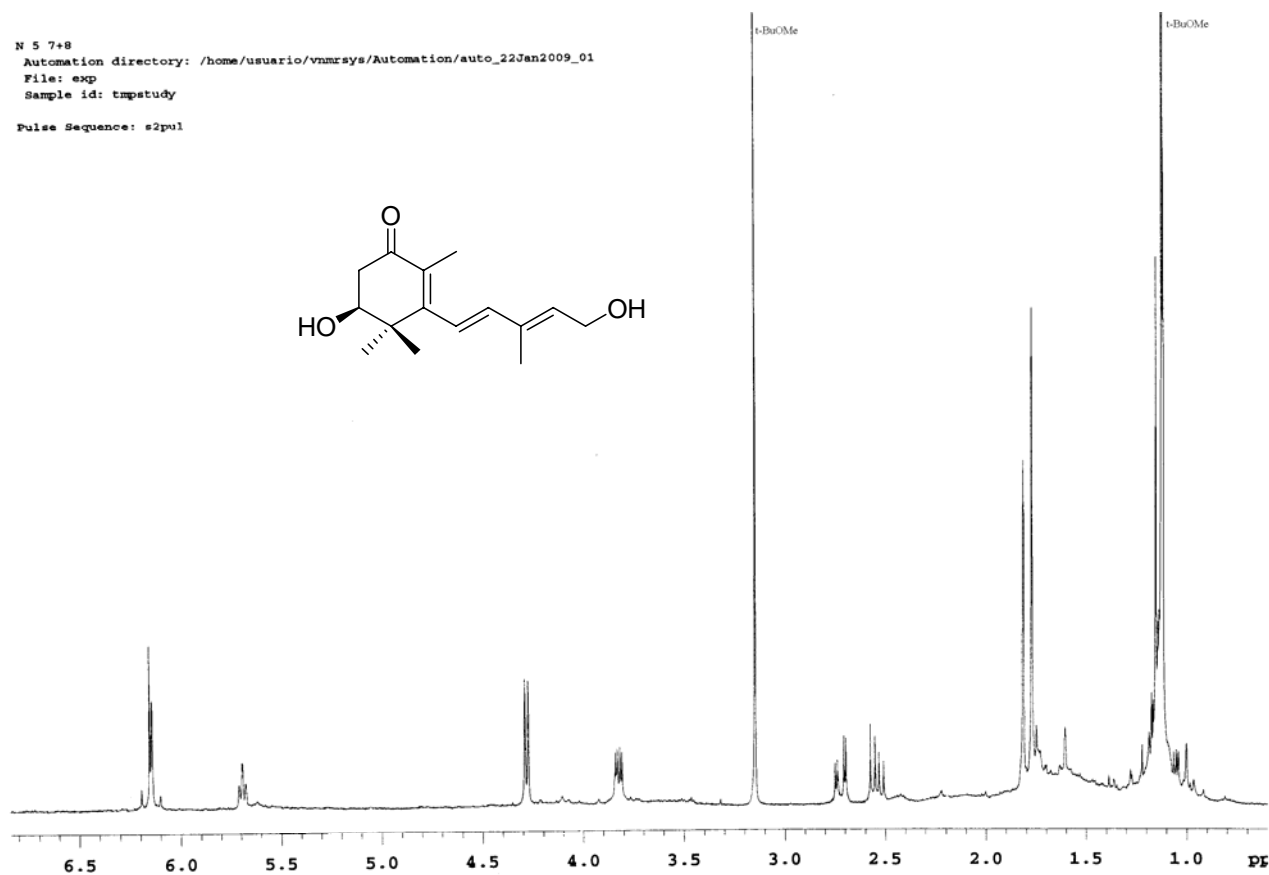

Spectrum  $^1\text{H}$  NMR of **3**

DAIYANG-AU  
File: KP  
Sample id: tmpstudy  
Pulse Sequence: s2pul

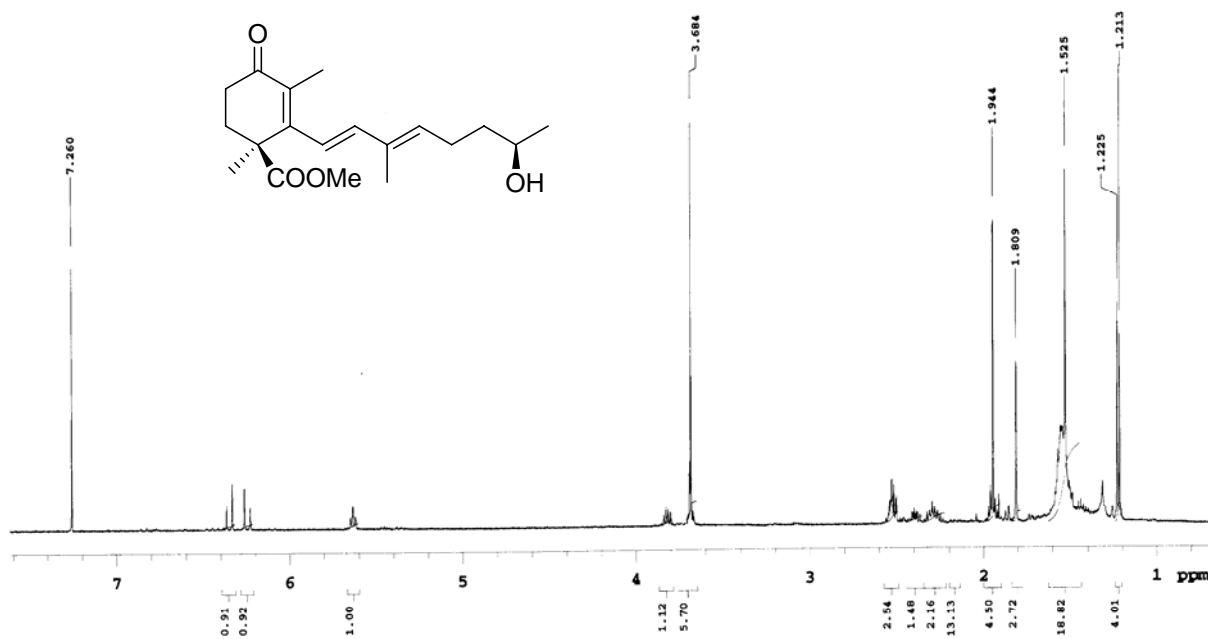

Spectrum  $^1\text{H}$  NMR of **11a** (9E)

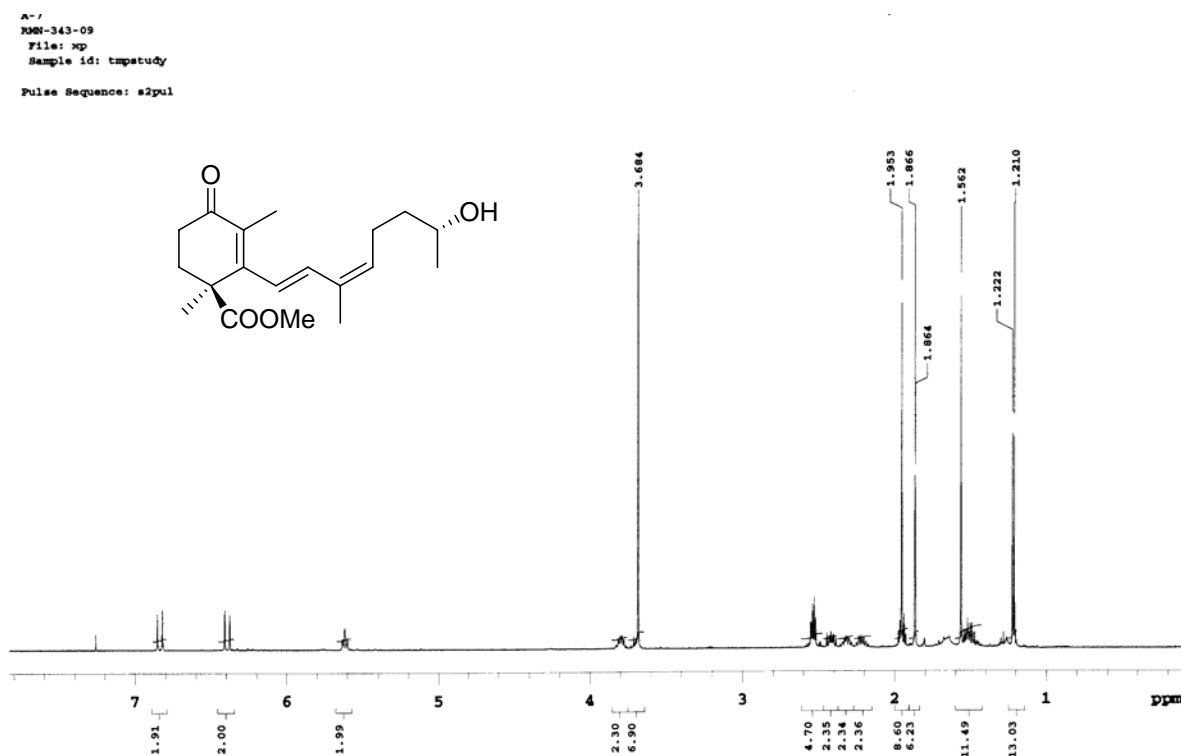

Spectrum  $^1\text{H}$  NMR of **9a** and **10** (9Z)

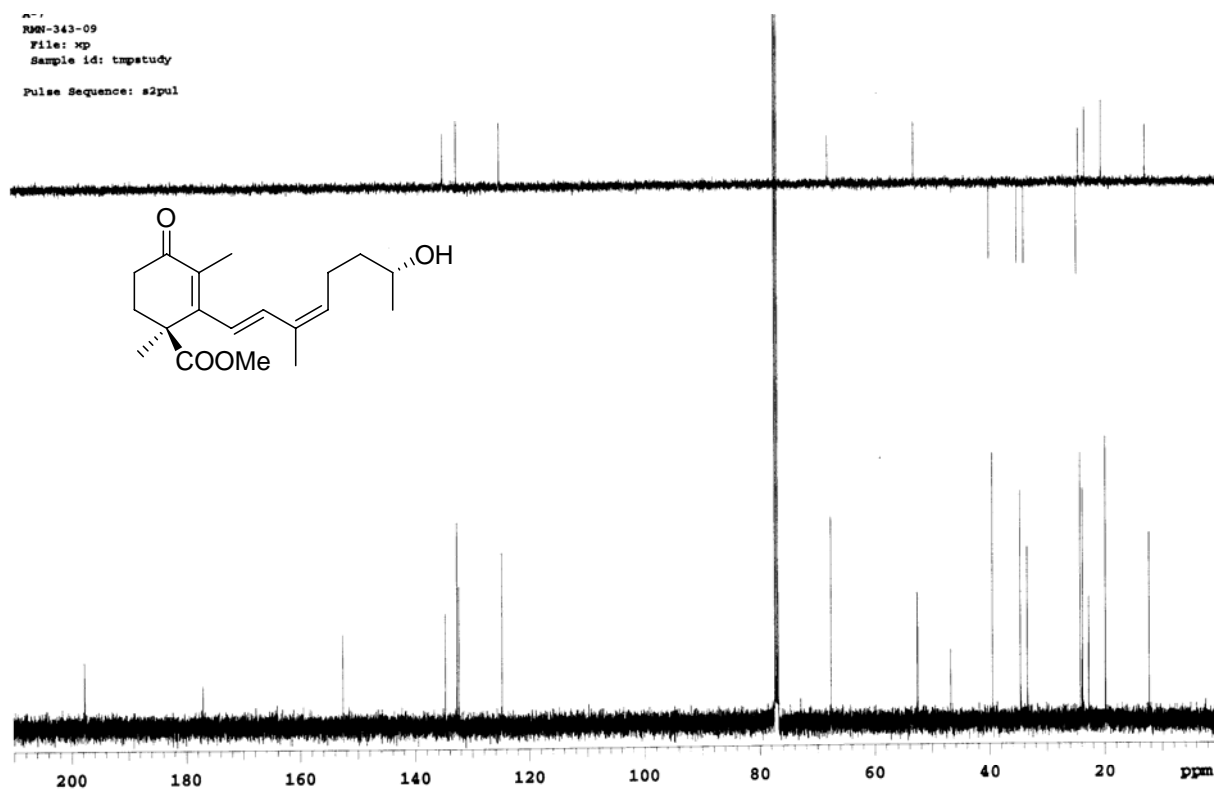

Spectrum  $^{13}\text{C}$  NMR of **9a** and **10** (9Z)
